# Supplementary material for: Impact of BMI, Physical Activity, and Sitting Time Levels on Health-Related Outcomes in a Group of Overweight and Obese Adults with and without Type 2 Diabetes
Source: MDPI journal article supplement (doi:10.3390/jfmk7010012), 2022-01-17
Supplement: s1 [file s1]

**Table S1a.** Baseline values: mean values of all parameters in the entire sample and in the BMI subgroups. Data are presented as means  $\pm$  SDs. Statistical significance was set for p values  $\leq 0.05$ .

| Outcomes            | Total Sample<br>n = 293 | OVER<br>n = 63     | I OB<br>n = 131    | II OB<br>n = 99     | F       | p     |
|---------------------|-------------------------|--------------------|--------------------|---------------------|---------|-------|
| Age                 | 53.08 $\pm$ 9.07        | 57.43 $\pm$ 7.89   | 57.76 $\pm$ 8.75   | 50.73 $\pm$ 9.29    | 11.411  | <.001 |
| SBP                 | 135.05 $\pm$ 17.43      | 133.68 $\pm$ 11.10 | 132.52 $\pm$ 22.7  | 139.04 $\pm$ 13.26  | 1.907   | .153  |
| DBP                 | 82.75 $\pm$ 8.63        | 80.44 $\pm$ 6.2    | 81.57 $\pm$ 8.89   | 85.85 $\pm$ 9.13    | 4.960   | .008  |
| GLYC                | 119.95 $\pm$ 43.08      | 124.52 $\pm$ 42.65 | 114.98 $\pm$ 38.33 | 122.64 $\pm$ 48.90  | 0.626   | .536  |
| HbA1c               | 6.61 $\pm$ 1.35         | 6.86 $\pm$ 1.38    | 6.44 $\pm$ 1.25    | 6.61 $\pm$ 1.42     | 0.926   | .399  |
| COL                 | 200.19 $\pm$ 39.25      | 191.74 $\pm$ 45.22 | 200.77 $\pm$ 42.56 | 205.84 $\pm$ 28.37  | 1.267   | .285  |
| HDL                 | 47.74 $\pm$ 10.05       | 48.85 $\pm$ 8.89   | 48.58 $\pm$ 10.94  | 45.96 $\pm$ 9.74    | 1.092   | .339  |
| LDL                 | 121.71 $\pm$ 36.14      | 117.51 $\pm$ 40.16 | 121.69 $\pm$ 81.03 | 125.12 $\pm$ 28.52  | 0.402   | .670  |
| TRIG                | 153.98 $\pm$ 92.29      | 127.38 $\pm$ 63.04 | 146.60 $\pm$ 81.03 | 182.46 $\pm$ 114.63 | 3.943   | .022  |
| WEIGHT              | 95.61 $\pm$ 17.25       | 79 $\pm$ 8.96      | 92.08 $\pm$ 11.84  | 110.84 $\pm$ 14.87  | 135.576 | <.001 |
| BMI                 | 33.59 $\pm$ 4.49        | 28.04 $\pm$ 1.31   | 32.46 $\pm$ 1.48   | 38.63 $\pm$ 2.99    | 528,954 | <.001 |
| WC                  | 111.61 $\pm$ 12.02      | 100.02 $\pm$ 7.46  | 108.92 $\pm$ 7.32  | 122.39 $\pm$ 10.52  | 141.425 | <.001 |
| FM%                 | 38.19 $\pm$ 7.62        | 32.76 $\pm$ 6.8    | 37.57 $\pm$ 6.68   | 42.42 $\pm$ 6.87    | 39.806  | <.001 |
| MM                  | 56.08 $\pm$ 11.96       | 50.56 $\pm$ 9.34   | 54.94 $\pm$ 11.12  | 61.03 $\pm$ 12.67   | 17.455  | <.001 |
| LAT                 | 39.11 $\pm$ 10.92       | 35.56 $\pm$ 9.21   | 38.84 $\pm$ 10.76  | 41.70 $\pm$ 11.54   | 6.298   | .002  |
| CHEST               | 27.98 $\pm$ 9.67        | 25.23 $\pm$ 8.44   | 27.19 $\pm$ 9.07   | 30.73 $\pm$ 10.53   | 7.153   | <.001 |
| PRESS               | 157.54 $\pm$ 36.09      | 148.67 $\pm$ 34.73 | 154.57 $\pm$ 35.81 | 167.01 $\pm$ 35.56  | 5.850   | .003  |
| LEXT                | 31.02 $\pm$ 10.72       | 28.61 $\pm$ 9.05   | 29.16 $\pm$ 9.80   | 34.88 $\pm$ 11.79   | 10.438  | <.001 |
| VB                  | -8.7 $\pm$ 9.83         | -9.33 $\pm$ 10.16  | -7.69 $\pm$ 9.75   | -9.66 $\pm$ 9.68    | 1.284   | .278  |
| HB                  | 25.83 $\pm$ 10.54       | 26.46 $\pm$ 10.86  | 27.18 $\pm$ 9.86   | 23.59 $\pm$ 10.95   | 3.399   | .035  |
| VO <sub>2</sub> max | 19.52 $\pm$ 9.3         | 23.39 $\pm$ 9.44   | 20.48 $\pm$ 8.82   | 15.79 $\pm$ 8.57    | 15.534  | <.001 |
| Adherence           | 86.9 $\pm$ 10.28        | 88.2 $\pm$ 9.19    | 86.4 $\pm$ 10.38   | 86.8 $\pm$ 10.82    | .611    | .544  |
| MET-h per week      | 16.46 $\pm$ 24.71       | 15.32 $\pm$ 16.92  | 18.26 $\pm$ 26.80  | 14.81 $\pm$ 26.03   | 0.634   | .531  |
| SIT                 | 5.36 $\pm$ 3.17         | 5.34 $\pm$ 2.99    | 5.22 $\pm$ 3.22    | 5.55 $\pm$ 3.23     | 0.296   | .744  |

OVER= people with overweight; I OB= people with I degree of obesity; IIOB= people with II degrees (or superior) of obesity.

SBP: systolic blood pressure; DBP: diastolic blood pressure; GLYC: fasting plasma glucose; HbA1c: glycosylated hemoglobin; COL: total cholesterol; HDL: high-density lipoprotein; LDL: low-density lipoprotein; TRIG: triglycerides; BMI: body mass index; FM%: fat mass percentage; MM: muscle mass; LAT: Lat Machine test value; CHEST = Chest press test value; PRESS = leg press test value; LEXT = leg extension test value; VB: vertical bending test value; HB: horizontal bending test value; VO<sub>2</sub> max: maximal oxygen consumption value; Adherence = the percentage of adherence to exercise intervention (calculated as number of sessions performed / total number of sessions); MET-h per week = weekly total physical activity energy expenditure; SIT = daily sitting time.

**Table S1b.** Baseline values: mean values of all parameters in the entire sample and in the PAL subgroups. Data are presented as means  $\pm$  SDs. Statistical significance was set for p values  $\leq 0.05$ .

| Outcomes            | Total Sample<br><i>n</i> = 293   | high PAL<br><i>n</i> = 32        | moderate PAL<br><i>n</i> = 108 | low PAL<br><i>n</i> = 153        | F           | <i>p</i>        |
|---------------------|----------------------------------|----------------------------------|--------------------------------|----------------------------------|-------------|-----------------|
| Age                 | 53.08 $\pm$ 9.07                 | 50.72 $\pm$ 9.56                 | 54.30 $\pm$ 9.08               | 52.71 $\pm$ 8.89                 | 2.199       | .113            |
| SBP                 | 135.05 $\pm$ 17.43               | 132.67 $\pm$ 17.10               | 135.93 $\pm$ 21.97             | 134.86 $\pm$ 12.69               | 0.211       | .810            |
| DBP                 | 82.75 $\pm$ 8.63                 | 79.33 $\pm$ 8.21                 | 83.49 $\pm$ 8.61               | 82.92 $\pm$ 8.69                 | 1.399       | .250            |
| GLYC                | 119.95 $\pm$ 43.08               | 137.13 $\pm$ 47.86               | 117.07 $\pm$ 43.54             | 118.31 $\pm$ 41.23               | 1.366       | .259            |
| HbA1c               | 6.61 $\pm$ 1.35                  | 7.06 $\pm$ 1.27                  | 6.48 $\pm$ 1.38                | 6.62 $\pm$ 1.34                  | 1.041       | .356            |
| COL                 | 200.19 $\pm$ 39.25               | 184.73 $\pm$ 19.86               | 207.55 $\pm$ 39.78             | 197.36 $\pm$ 41.16               | 2.363       | .098            |
| HDL                 | 47.74 $\pm$ 10.05                | 46.43 $\pm$ 9.20                 | 46.91 $\pm$ 8.73               | 48.76 $\pm$ 11.28                | 0.619       | .540            |
| LDL                 | 121.71 $\pm$ 36.14               | 109.55 $\pm$ 18.18               | 127.07 $\pm$ 35.82             | 119.85 $\pm$ 38.88               | 1.372       | .258            |
| TRIG                | 153.98 $\pm$ 92.29               | 157.80 $\pm$ 133.18              | 153.79 $\pm$ 95.80             | 153.25 $\pm$ 78.48               | 0.015       | .985            |
| WEIGHT              | 95.61 $\pm$ 17.25                | 98.93 $\pm$ 16.54                | 93.84 $\pm$ 17.10              | 96.16 $\pm$ 17.46                | 1.241       | .291            |
| BMI                 | 33.59 $\pm$ 4.49                 | 34.01 $\pm$ 4.32                 | 32.73 $\pm$ 4.31               | 34.12 $\pm$ 4.58                 | 3.244       | <b>.040</b>     |
| WC                  | 111.61 $\pm$ 12.02               | 112.78 $\pm$ 11.88               | 110.41 $\pm$ 12.38             | 112.22 $\pm$ 11.8                | 0.887       | .413            |
| FM%                 | 38.19 $\pm$ 7.62                 | 37.35 $\pm$ 7.66                 | 37.64 $\pm$ 7.46               | 38.76 $\pm$ 7.73                 | 0.890       | .412            |
| MM                  | 56.08 $\pm$ 11.96                | 58.69 $\pm$ 11.57                | 55.50 $\pm$ 11.83              | 55.93 $\pm$ 12.14                | 0.901       | .407            |
| LAT                 | 39.11 $\pm$ 10.92                | 43.15 $\pm$ 12.49                | 38.00 $\pm$ 9.93               | 39.09 $\pm$ 11.14                | 2.635       | .073            |
| CHEST               | 27.98 $\pm$ 9.67                 | 31.22 $\pm$ 12.04                | 27.06 $\pm$ 9.51               | 27.98 $\pm$ 9.18                 | 2.195       | .113            |
| PRESS               | 157.54 $\pm$ 36.09               | 165.69 $\pm$ 33.93               | 154.38 $\pm$ 34.78             | 158.17 $\pm$ 37.33               | 1.200       | .303            |
| LEXT                | 31.02 $\pm$ 10.72                | 35.06 $\pm$ 11.70                | 30.67 $\pm$ 9.56               | 30.50 $\pm$ 11.21                | 2.242       | .108            |
| VB                  | -8.7 $\pm$ 9.83                  | -6.34 $\pm$ 9.76                 | -7.57 $\pm$ 9.64               | -9.99 $\pm$ 9.84                 | 2.976       | .053            |
| HB                  | 25.83 $\pm$ 10.54                | 29.25 $\pm$ 11.65                | 26.52 $\pm$ 10.12              | 24.62 $\pm$ 10.45                | 2.948       | .054            |
| VO <sub>2</sub> max | 19.52 $\pm$ 9.3                  | 21.57 $\pm$ 8.92                 | 20.82 $\pm$ 9.48               | 18.18 $\pm$ 9.11                 | 3.484       | <b>.032</b>     |
| <b>Adherence</b>    | <b>86.9<math>\pm</math>10.28</b> | <b>86.3<math>\pm</math>10.13</b> | <b>88<math>\pm</math>10.09</b> | <b>86.1<math>\pm</math>11.65</b> | <b>.935</b> | <b>.394</b>     |
| MET-h per week      | 16.46 $\pm$ 24.71                | 71.35 $\pm$ 32.69                | 20.35 $\pm$ 11.81              | 2.24 $\pm$ 2.84                  | 379.543     | <b>&lt;.001</b> |
| SIT                 | 5.36 $\pm$ 3.17                  | 4.06 $\pm$ 2.35                  | 5.10 $\pm$ 2.8                 | 5.80 $\pm$ 3.48                  | 4.508       | <b>.012</b>     |

SBP: systolic blood pressure; DBP: diastolic blood pressure; GLYC: fasting plasma glucose; HbA1c: glycosylated hemoglobin; COL: total cholesterol; HDL: high-density lipoprotein; LDL: low-density lipoprotein; TRIG: triglycerides; BMI: body mass index; FM%: fat mass percentage; MM: muscle mass; LAT: Lat Machine test value; CHEST = Chest press test value; PRESS = leg press test value; LEXT = leg extension test value; VB: vertical bending test value; HB: horizontal bending test value; VO<sub>2</sub> max: maximal oxygen consumption value; **Adherence = the percentage of adherence to exercise intervention (calculated as number of sessions performed / total number of sessions)**; MET-h per week = weekly total physical activity energy expenditure; SIT = daily sitting time.

**Table S1c.** Baseline values: mean values of all parameters in the entire sample and in the SIT subgroups. Data are presented as means  $\pm$  SDs. Statistical significance was set for p values  $\leq 0.05$ .

| Outcomes            | Total Sample<br><i>n</i> = 293   | very high SIT<br><i>n</i> = 43  | high SIT<br><i>n</i> = 99       | medium SIT<br><i>n</i> = 63    | low SIT<br><i>n</i> = 82         | F            | <i>p</i>        |
|---------------------|----------------------------------|---------------------------------|---------------------------------|--------------------------------|----------------------------------|--------------|-----------------|
| Age                 | 52.84 $\pm$ 9.01                 | 52.19 $\pm$ 9.54                | 53.81 $\pm$ 8.65                | 55.08 $\pm$ 9.75               | 50.30 $\pm$ 8.02                 | 4.043        | <b>.008</b>     |
| SBP                 | 135.29 $\pm$ 17.54               | 130.50 $\pm$ 29.88              | 136.95 $\pm$ 13.64              | 133.96 $\pm$ 11.82             | 137.13 $\pm$ 15.04               | 0.859        | .464            |
| DBP                 | 83.04 $\pm$ 8.64                 | 86.00 $\pm$ 8.40                | 82.20 $\pm$ 7.83                | 80.96 $\pm$ 7.62               | 83.64 $\pm$ 9.94                 | 1.575        | .199            |
| GLYC                | 121.43 $\pm$ 43.49               | 131.00 $\pm$ 61.96              | 122.82 $\pm$ 40.76              | 121.20 $\pm$ 41.41             | 114.79 $\pm$ 34.74               | 0.666        | .575            |
| HbA1c               | 6.64 $\pm$ 1.38                  | 7.09 $\pm$ 1.94                 | 6.75 $\pm$ 1.37                 | 6.57 $\pm$ 1.30                | 6.32 $\pm$ 0.98                  | 1.467        | .227            |
| COL                 | 200.53 $\pm$ 39.57               | 206.41 $\pm$ 41.98              | 194.15 $\pm$ 37.31              | 207.52 $\pm$ 45.15             | 198.95 $\pm$ 36.63               | 0.807        | .492            |
| HDL                 | 47.71 $\pm$ 10.16                | 44.95 $\pm$ 8.48                | 47.41 $\pm$ 8.78                | 49.15 $\pm$ 12.74              | 48.36 $\pm$ 10.31                | 0.708        | .549            |
| LDL                 | 122.66 $\pm$ 36.24               | 129.55 $\pm$ 37.27              | 115.41 $\pm$ 34.93              | 132.60 $\pm$ 40.50             | 119.89 $\pm$ 33.39               | 1.401        | .246            |
| TRIG                | 154.17 $\pm$ 93.67               | 189.10 $\pm$ 118.35             | 146.54 $\pm$ 86.95              | 149.26 $\pm$ 109.51            | 146.98 $\pm$ 71.26               | 1.172        | .323            |
| WEIGHT              | 95.79 $\pm$ 17.28                | 101.81 $\pm$ 20.77              | 96.22 $\pm$ 16.21               | 91.63 $\pm$ 17.25              | 95.32 $\pm$ 15.85                | 3.066        | <b>.028</b>     |
| BMI                 | 33.62 $\pm$ 4.5                  | 34.53 $\pm$ 5.06                | 33.80 $\pm$ 4.16                | 32.58 $\pm$ 4.68               | 33.72 $\pm$ 4.37                 | 1.808        | .146            |
| WC                  | 111.69 $\pm$ 12.09               | 114.71 $\pm$ 14.70              | 112.09 $\pm$ 11.52              | 109.90 $\pm$ 12.33             | 111.02 $\pm$ 10.95               | 1.459        | .226            |
| FM%                 | 38.17 $\pm$ 7.58                 | 37.43 $\pm$ 8.51                | 39.14 $\pm$ 7.50                | 37.86 $\pm$ 7.16               | 37.61 $\pm$ 7.50                 | 0.862        | .461            |
| MM                  | 56.21 $\pm$ 11.94                | 60.38 $\pm$ 13.84               | 55.54 $\pm$ 11.47               | 53.96 $\pm$ 11.38              | 56.54 $\pm$ 56.54                | 2.653        | <b>.049</b>     |
| LAT                 | 39.27 $\pm$ 10.94                | 41.35 $\pm$ 11.80               | 39.38 $\pm$ 11.47               | 38.29 $\pm$ 8.92               | 38.78 $\pm$ 11.28                | 0.739        | .529            |
| CHEST               | 28.06 $\pm$ 9.63                 | 29.74 $\pm$ 9.52                | 27.16 $\pm$ 9.17                | 26.89 $\pm$ 8.62               | 29.16 $\pm$ 10.80                | 1.372        | .252            |
| PRESS               | 158.01 $\pm$ 35.90               | 173.89 $\pm$ 33.10              | 156.89 $\pm$ 35.48              | 154.92 $\pm$ 33.47             | 153.55 $\pm$ 37.89               | 3.434        | <b>.017</b>     |
| LEXT                | 31.17 $\pm$ 10.72                | 33.41 $\pm$ 10.47               | 31.05 $\pm$ 11.47               | 29.77 $\pm$ 8.63               | 31.23 $\pm$ 11.30                | 0.940        | .422            |
| VB                  | -8.64 $\pm$ 9.86                 | -10.98 $\pm$ 11.81              | -9.44 $\pm$ 9.78                | -8.16 $\pm$ 9.71               | -6.80 $\pm$ 8.73                 | 2.004        | .114            |
| HB                  | 25.94 $\pm$ 10.62                | 22.95 $\pm$ 12.21               | 25.78 $\pm$ 10.51               | 25.98 $\pm$ 10.19              | 27.66 $\pm$ 10.00                | 1.835        | .141            |
| VO <sub>2</sub> max | 19.69 $\pm$ 9.24                 | 20.79 $\pm$ 8.39                | 18.97 $\pm$ 9.50                | 19.51 $\pm$ 9.56               | 20.12 $\pm$ 9.18                 | 0.466        | .706            |
| Adherence           | <b>86.8<math>\pm</math>10.29</b> | <b>87.3<math>\pm</math>8.90</b> | <b>88.2<math>\pm</math>9.55</b> | <b>86<math>\pm</math>11.04</b> | <b>85.8<math>\pm</math>11.94</b> | <b>0.780</b> | <b>.506</b>     |
| MET-h per week      | 16.61 $\pm$ 24.88                | 6.65 $\pm$ 9.80                 | 13.60 $\pm$ 18.81               | 22.71 $\pm$ 33.94              | 20.79 $\pm$ 26.76                | 5.015        | <b>.002</b>     |
| SIT                 | 5.36 $\pm$ 3.17                  | 10.44 $\pm$ 1.48                | 6.81 $\pm$ 0.83                 | 4.62 $\pm$ 0.48                | 1.49 $\pm$ 1.24                  | 815.446      | <b>&lt;.001</b> |

SBP: systolic blood pressure; DBP: diastolic blood pressure; GLYC: fasting plasma glucose; HbA1c: glycosylated hemoglobin; COL: total cholesterol; HDL: high-density lipoprotein; LDL: low-density lipoprotein; TRIG: triglycerides; BMI: body mass index; FM%: fat mass percentage; MM: muscle mass; LAT: Lat Machine test value; CHEST = Chest press test value; PRESS = leg press test value; LEXT = leg extension test value; VB: vertical bending test value; HB: horizontal bending test value; VO<sub>2</sub> max: maximal oxygen consumption value; **Adherence = the percentage of adherence to exercise intervention (calculated as number of sessions performed / total number of sessions)**; MET-h per week = weekly total physical activity energy expenditure; SIT = daily sitting time.
